# Supplementary material for: Antioxidant and Antiproliferation Activities of Lemon Verbena (Aloysia citrodora): An In Vitro and In Vivo Study
Source: MDPI journal article supplement (doi:10.3390/plants11060785), 2022-03-16
Supplement: s1 [file s1]

**Figure S1**

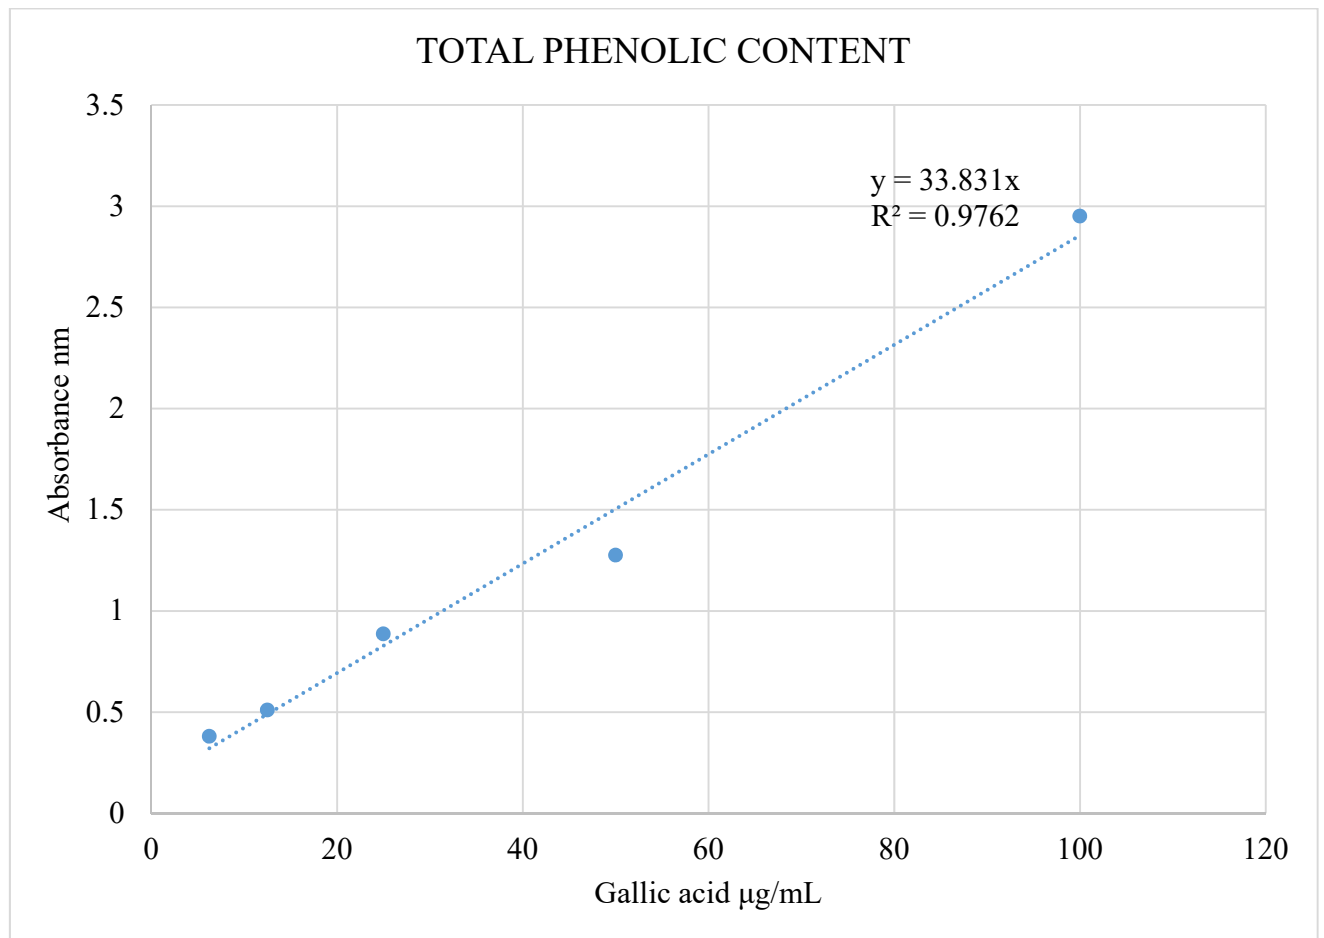

**Figure S1:** Standard curve for phenolics

Figure S2

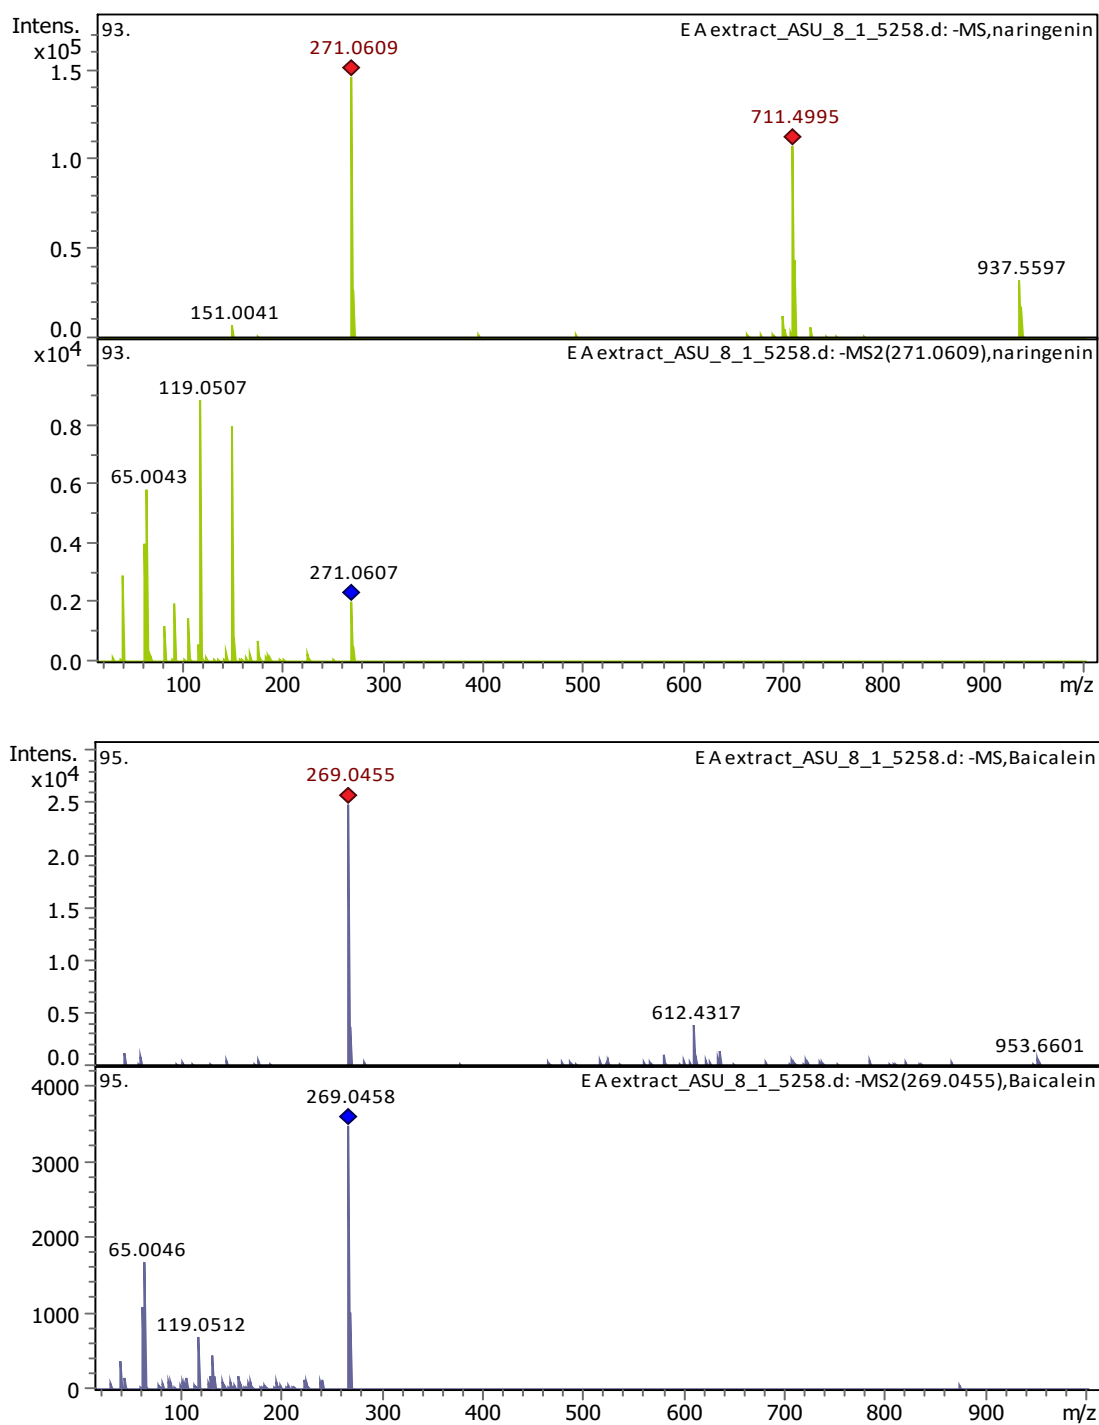

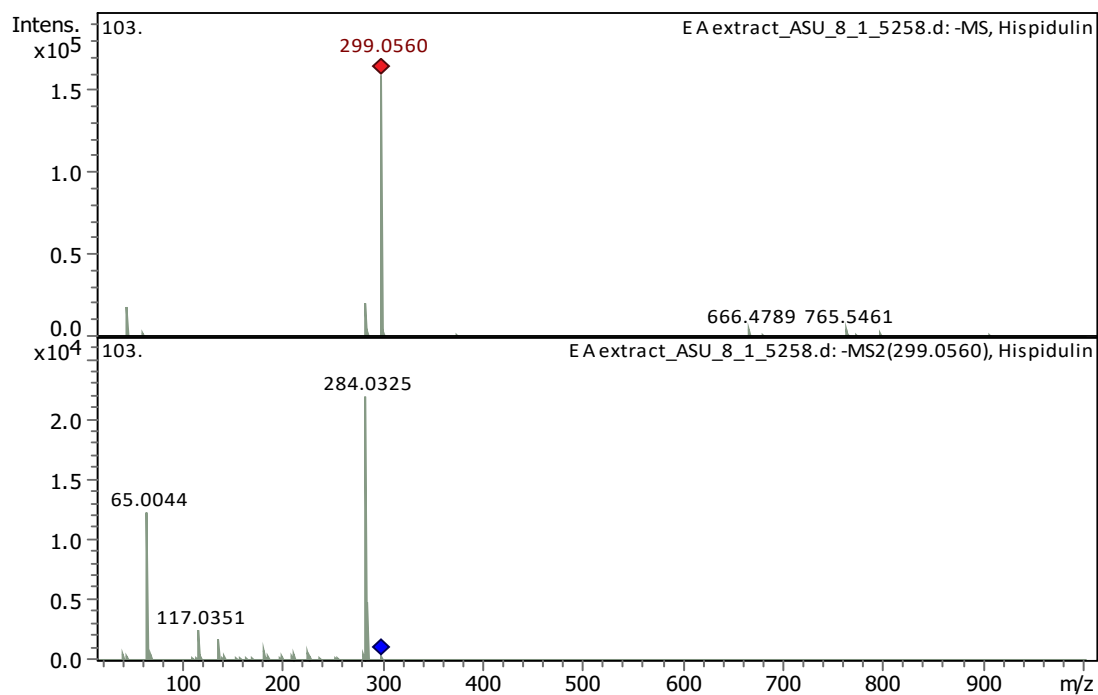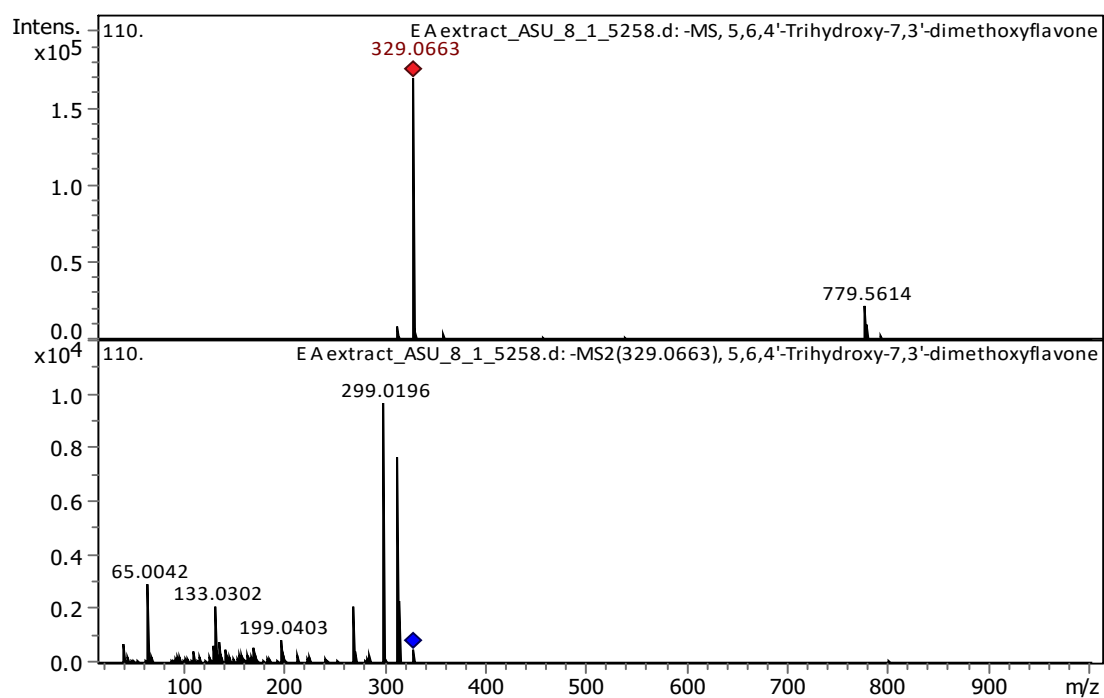

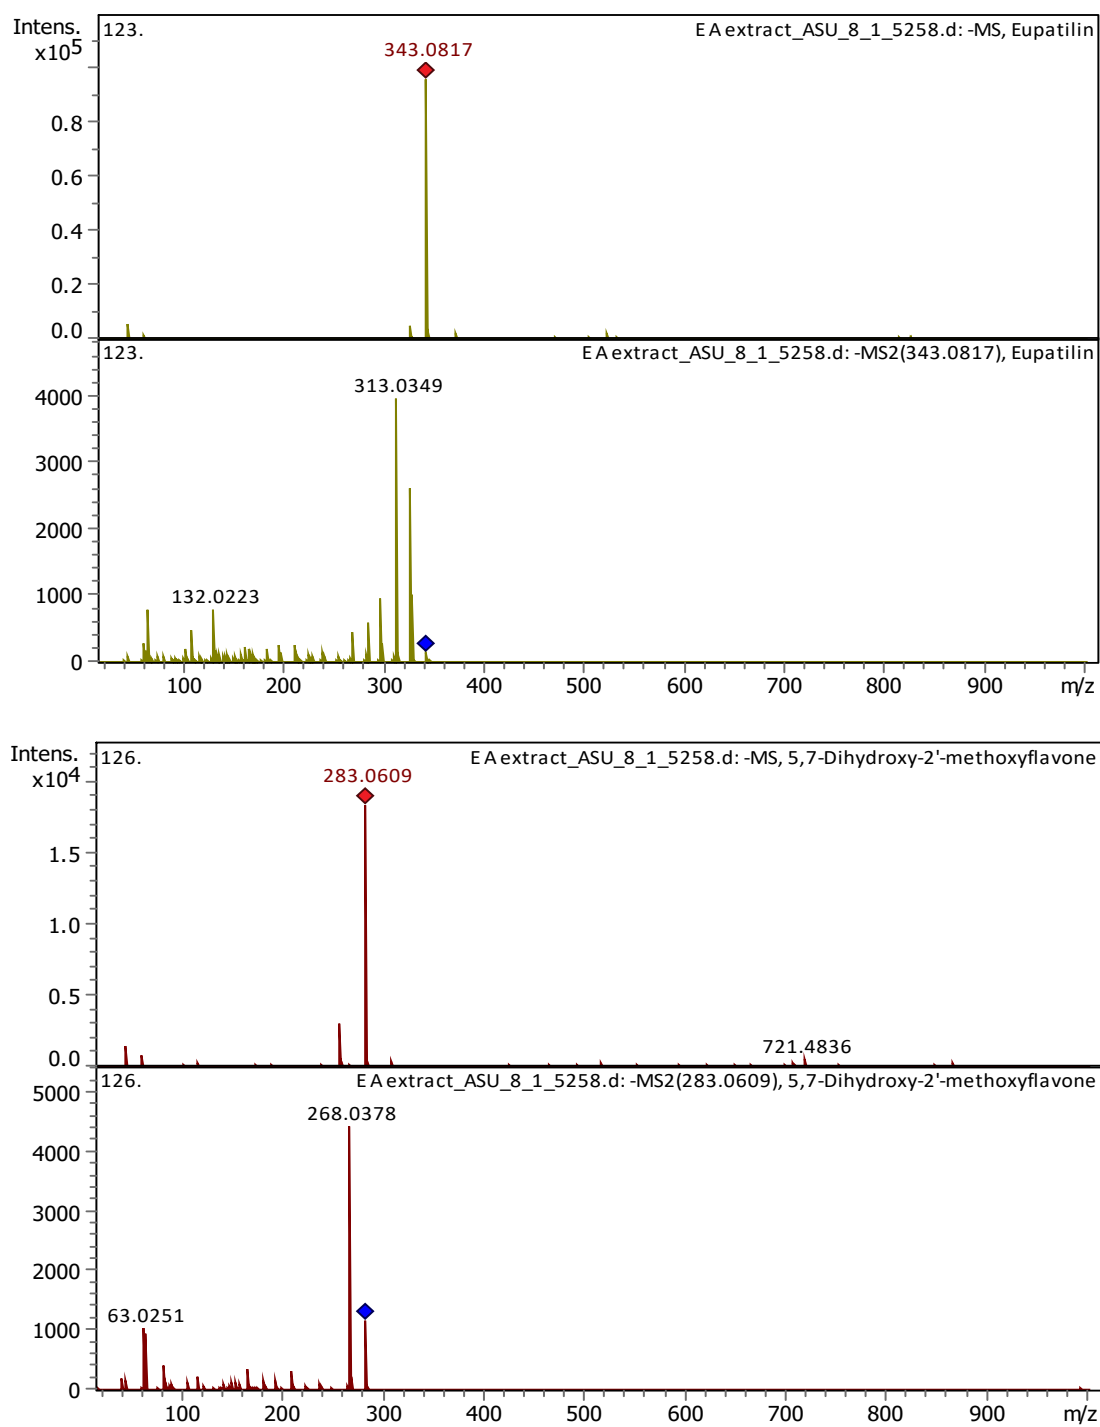

**Figure S2:** LC-MS Chromatogram obtained from *A. citrodora* ethyl acetate extract

Figure S3

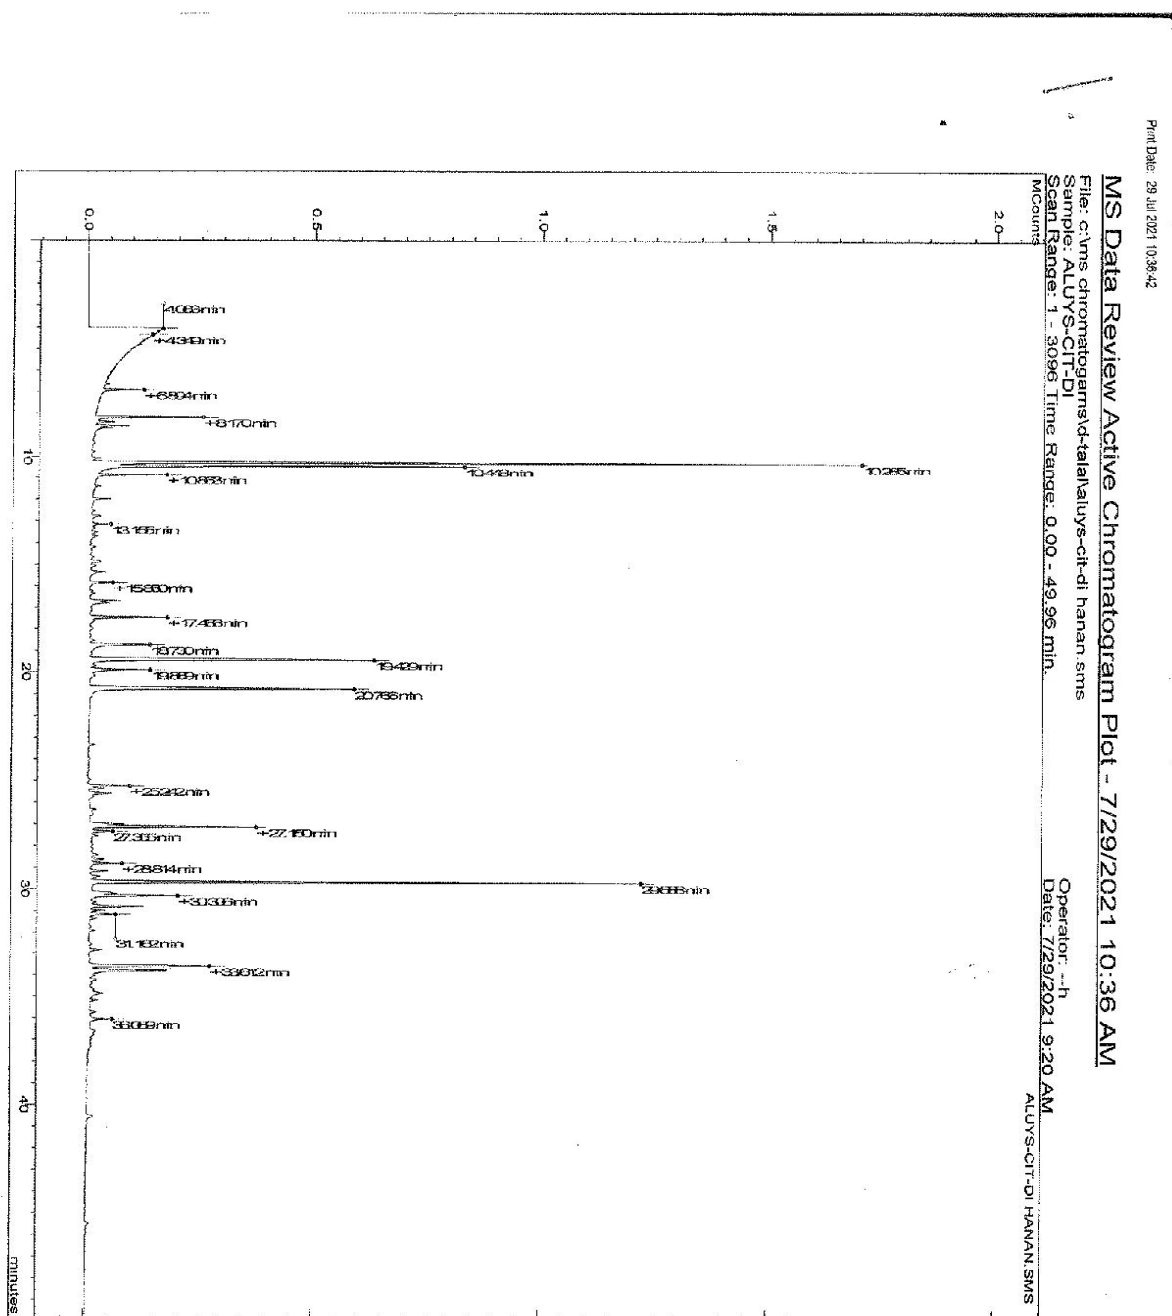

Figure S3: GC-MS analysis of the hydrodistilled oil

Figure S4

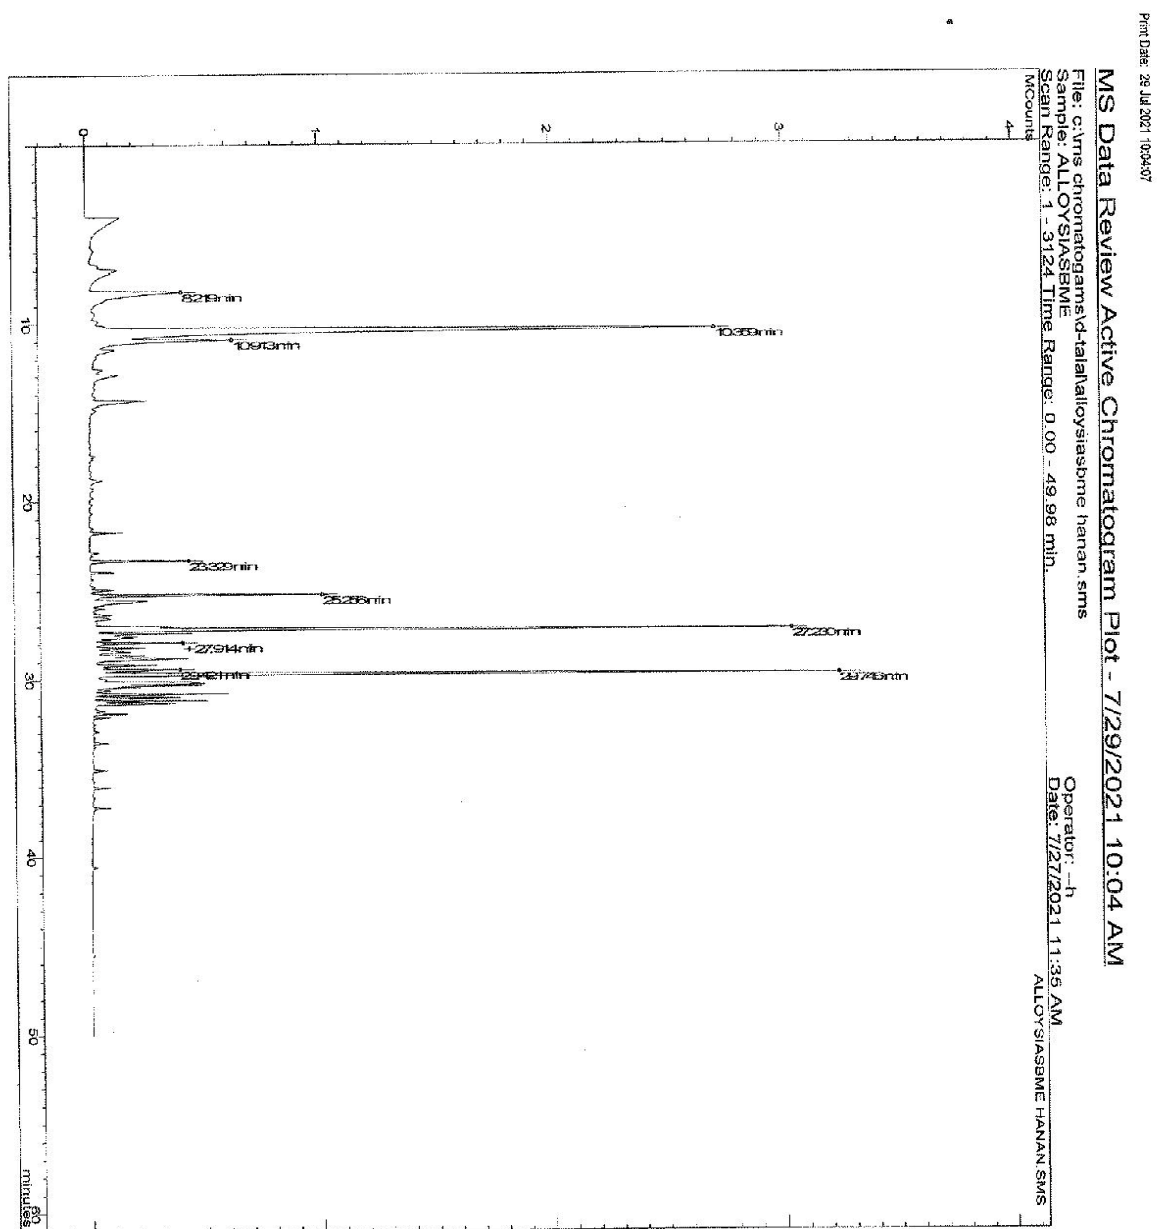

Figure S4: GC-MS analysis of the SPME extracted oil

Figure S5

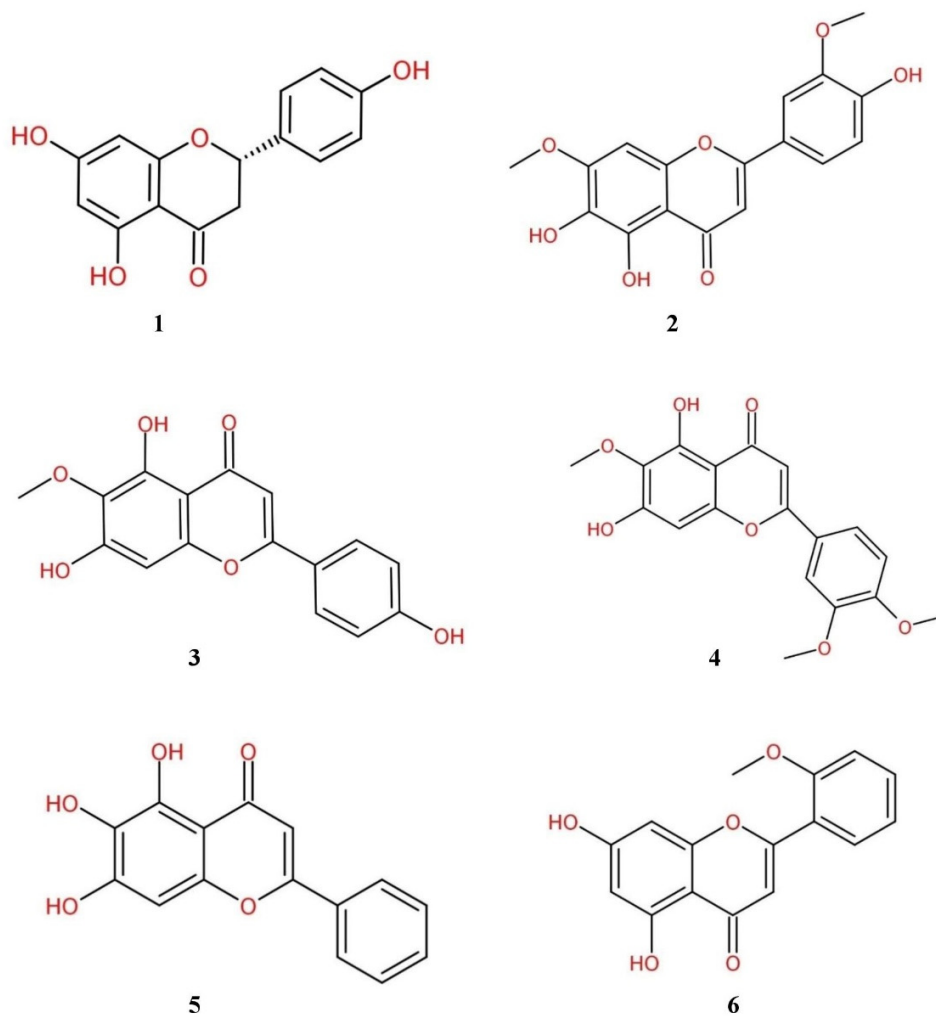

**Figure S5:** Major compounds identified in ethyl acetate extract of *A. citrodora* using LC-MS. 1: Naringenin, 2: 5-TDMF, 3: Hispidulin, 4: Eupatilin, 5: Baicalein, 6: 2'-Methoxychrysin
